# Supplementary material for: MicroRNA-29b Mediates Lung Mesenchymal-Epithelial Transition and Prevents Lung Fibrosis in the Silicosis Model
Source: PubMed Central journal article supplement — Mol Ther Nucleic Acids. 2018 Nov 6;14:20–31. doi: 10.1016/j.omtn.2018.10.017 (PMC6282658; doi:10.1016/j.omtn.2018.10.017), 2018-11-06
Supplement: mmc1.pdf [file mmc1.pdf]

**OMTN, Volume 14**

**Supplemental Information**

**MicroRNA-29b Mediates Lung**

**Mesenchymal-Epithelial Transition and Prevents**

**Lung Fibrosis in the Silicosis Model**

**Jingping Sun, Qiuyue Li, Ximeng Lian, Zhonghui Zhu, Xiaowei Chen, Wanying Pei, Siling Li, Ali Abbas, Yan Wang, and Lin Tian**

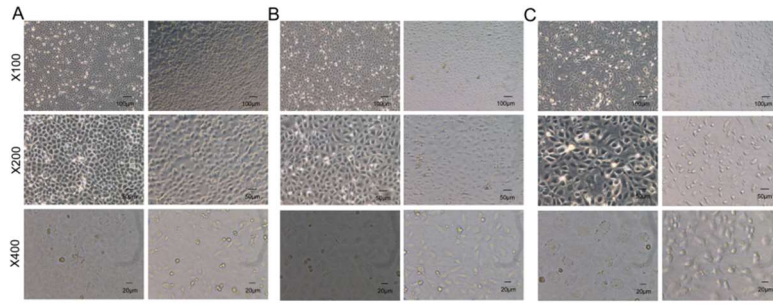

Figure S1

**Figure S1. Silica induced the morphology change of RLE-6TN cells.**

Exposure with silica for 48h induced a spindle-shaped change in RLE-6TN cells regardless of high (Figure S1A), medium (Figure S1B) and low (Figure S1C) confluence.

Table S1. The primer sequences of mRNA and miRNA

| Oligo                          | Species         | Forward Sequences 5'-3' | Reverse Sequences 3'-5' |
|--------------------------------|-----------------|-------------------------|-------------------------|
| <b>GAPDH</b>                   | Mouse           | AAGAAGGTGGTGAAGCAGGC    | TCCACCACCCTGTTGCTGTA    |
| <b>CDH1</b>                    | Mouse           | GATCCTGAGCTGCCTCACAA    | CAGCCTGAACCACCAGAGTG    |
| <b>VIM</b>                     | Mouse           | CTGAGGCTGCCAACCGGAACAA  | CCTCGCCTTCCAGCAGCTTCC   |
| <b><math>\alpha</math>-SMA</b> | Mouse           | GAGCATCCGACACTGCTGAC    | GCACAGCCTGAATAGCCA CA   |
| <b>COL1A1</b>                  | Mouse           | GCTCCTCTTAGGGGCCACT     | CCACGTCTCACCATTGGGG     |
| <b>FN</b>                      | Mouse           | CATCCTGTGGGGATGGATTC    | TACGTGCAAGCACACCGATT    |
| <b>Snail</b>                   | Mouse           | TAGAGCTGACCTCGCTGTCC    | GAGGTGGACGAGAAGGACGA    |
| <b>GAPDH</b>                   | Rat             | AAGAAGGTGGTGAAGCAGGC    | TCCACCACCCTGTTGCTGTA    |
| <b>CDH1</b>                    | Rat             | ATGAGGTCGGTGCCCGTATT    | CTCGTTGGTCTTGGGGTCTGT   |
| <b>VIM</b>                     | Rat             | CTGCTGGAAGGGGAGGAGAG    | GGTCATCGTGGTGCTGAGAAG   |
| <b><math>\alpha</math>-SMA</b> | Rat             | CACGGCATCATCACCAACTG    | CCACGCGAAGCTCGTTATAGA   |
| <b>COL1A1</b>                  | Rat             | CAATGGCACGGCTGTGTGCG    | CACTCGCCCTCCCCTTTGG     |
| <b>Snail</b>                   | Rat             | AGAAGCCTTTCTCCTGCTCC    | CACTGGTATCTCTTACATCCGA  |
| <b>Tgfb1</b>                   | Rat             | CGCAACAACGCAATCTATG     | ACCAAGGTAACGCCAGGA      |
| <b>U6</b>                      | Human mouse rat | GACACGCAAATTCGTGAAGC    |                         |
| <b>miR-29b-3p</b>              | Human mouse rat | UAGCACCAUUUGAAAUCAGUGUU |                         |
